# Supplementary material
Source: PubMed Central journal article supplement (PMC3542637)
Supplement: NIHMS429289-supplement-1_si_001.pdf [file NIHMS429289-supplement-1_si_001.pdf]

## Supporting Information

### Discovery of an L-Fucono-1,5-Lactonase from cog3618 of the Amidohydrolase Superfamily

Merlin Eric Hobbs<sup>‡</sup>, Matthew Vetting<sup>§</sup>, Howard J. Williams<sup>ψ</sup>, Tamari  
Narindoshvili<sup>ψ</sup>, Devon M. Kebodeaux<sup>ψ</sup>, Brandan Hillerich<sup>§</sup>, Ronald D.  
Seidel<sup>§</sup>, Steven C. Almo<sup>§\*</sup>, and Frank M. Raushel<sup>ψ‡\*</sup>

---

**Table S1: Predicted L-fucono-1,5-lactonase genes inferred from homology**

| GI              | Organism                                                            | Locus Tag        | % identity to<br>Bmulj_04915 |
|-----------------|---------------------------------------------------------------------|------------------|------------------------------|
| <b>21225440</b> | <i>Streptomyces coelicolor</i> A3(2)                                |                  | 40                           |
| <b>21233488</b> | <i>Xanthomonas campestris</i> pv. <i>campestris</i> str. ATCC 33913 | XCC4066          | 36                           |
| <b>21244902</b> | <i>Xanthomonas axonopodis</i> pv. <i>citri</i> str. 306             | XAC4185          | 39                           |
| <b>27376236</b> | <i>Bradyrhizobium japonicum</i> USDA 110                            | blr1125          | 38                           |
| <b>29827946</b> | <i>Streptomyces avermitilis</i> MA-4680                             | SAV_1405         | 42                           |
| <b>29833828</b> | <i>Streptomyces avermitilis</i> MA-4680                             | SAV_7286         | 40                           |
| <b>32476116</b> | <i>Rhodopirellula baltica</i> SH 1                                  |                  | 40                           |
| <b>53721815</b> | <i>Burkholderia pseudomallei</i> K96243                             | BPSS0791         | 37                           |
| <b>58584161</b> | <i>Xanthomonas oryzae</i> pv. <i>oryzae</i> KACC 10331              | XOO4538          | 39                           |
| <b>66770453</b> | <i>Xanthomonas campestris</i> pv. <i>campestris</i> str. 8004       | XC_4156          | 36                           |
| <b>76819468</b> | <i>Burkholderia pseudomallei</i> 1710b                              | BURPS1710b_A2374 | 37                           |
| <b>78049839</b> | <i>Xanthomonas campestris</i> pv. <i>vesicatoria</i> str. 85-10     | XCV4283          | 37                           |
| <b>78061477</b> | <i>Burkholderia</i> sp. 383                                         | Bcep18194_B0627  | 87                           |
| <b>83717860</b> | <i>Burkholderia thailandensis</i> E264                              | BTH_II1605       | 36                           |
| <b>84625932</b> | <i>Xanthomonas oryzae</i> pv. <i>oryzae</i> MAFF 311018             | XOO_4275         | 38                           |
| <b>87200445</b> | <i>Novosphingobium aromaticivorans</i> DSM 12444                    | Saro_2432        | 35                           |
| <b>89054601</b> | <i>Jannaschia</i> sp. CCS1                                          | Jann_2110        | 37                           |
| <b>89067917</b> | <i>Oceanicola granulosus</i> HTCC2516                               | OG2516_05668     | 38                           |
| <b>89901904</b> | <i>Rhodoferax ferrireducens</i> T118                                | Rfer_3135        | 50                           |
| <b>90417671</b> | <i>Aurantimonas manganoxydans</i> SI85-9A1                          |                  | 37                           |
| <b>90581203</b> | <i>Vibrio angustum</i> S14                                          | VAS14_18294      | 34                           |
| <b>91777179</b> | <i>Burkholderia xenovorans</i> LB400                                | Bxe_B2958        | 37                           |
| <b>91788086</b> | <i>Polaromonas</i> sp. JS666                                        | Bpro_2213        | 31                           |

---

|                  |                                          |                  |     |
|------------------|------------------------------------------|------------------|-----|
| <b>107025688</b> | Burkholderia cenocepacia AU 105459       | Bcen_3331        | 89  |
| <b>107029209</b> | Burkholderia cenocepacia AU 105          | Bcen_6470        | 38  |
| <b>109897125</b> | Pseudoalteromonas atlantica T6c          | Patl_0798        | 41  |
| <b>110633962</b> | Chelativorans sp. BNC1                   | Meso_1610        | 100 |
| <b>110680910</b> | Roseobacter denitrificans Ch 114         | RD1_3763         | 37  |
| <b>114798305</b> | Hyphomonas neptunium ATCC 15444          | HNE_2135         | 35  |
| <b>115351277</b> | Burkholderia ambifaria AMMD              | Bamb_1224        | 35  |
| <b>115359191</b> | Burkholderia ambifaria AMMD              | Bamb_4444        | 89  |
| <b>116619827</b> | Candidatus Solibacter usitatus Ellin6076 | Acid_0697        | 44  |
| <b>116687080</b> | Burkholderia cenocepacia HI2424          | Bcen2424_6705    | 38  |
| <b>116693130</b> | Burkholderia cenocepacia HI2424          | Bcen2424_5036    | 89  |
| <b>117164624</b> | Streptomyces ambofaciens ATCC 23877      | SAMR0460         | 42  |
| <b>118587846</b> | Stappia aggregata IAM 12614              | SIAM614_09733    | 35  |
| <b>120436055</b> | Gramella forsetii KT0803                 | GFO_1704         | 41  |
| <b>124383148</b> | Burkholderia mallei NCTC 10229           | BMA10229_0824    | 37  |
| <b>126444884</b> | Burkholderia pseudomallei 668            | BURPS668_A1157   | 37  |
| <b>126447807</b> | Burkholderia mallei NCTC 10247           | BMA10247_A1787   | 37  |
| <b>126457121</b> | Burkholderia pseudomallei 1106a          | BURPS1106A_A1080 | 37  |
| <b>126731149</b> | Sagittula stellata E-37                  | SSE37_21960      | 34  |
| <b>126737148</b> | Roseobacter sp. SK209-2-6                | RSK20926_11974   | 34  |
| <b>134097110</b> | Saccharopolyspora erythraea NRRL 2338    | SACE_0497        | 40  |
| <b>134279263</b> | Burkholderia pseudomallei 305            | BURPS305_5343    | 37  |
| <b>134292096</b> | Burkholderia vietnamiensis G4            | Bcep1808_3379    | 85  |
| <b>146156271</b> | Flavobacterium johnsoniae UW101          | Fjoh_4117        | 36  |
| <b>146195583</b> | Bradyrhizobium sp. ORS 278               | BRADO5952        | 39  |
| <b>146301853</b> | Flavobacterium johnsoniae UW101          | Fjoh_4117        | 36  |

---

---

|                  |                                        |                     |     |
|------------------|----------------------------------------|---------------------|-----|
| <b>146342777</b> | Bradyrhizobium sp. ORS 278             | BRADO5952           | 39  |
| <b>146402531</b> | Acidiphilium cryptum JF-5              | Acry_1856           | 37  |
| <b>146405519</b> | Bradyrhizobium sp. BTAi1               | BBta_1822           | 40  |
| <b>148253346</b> | Bradyrhizobium sp. BTAi1               | BBta_1822           | 40  |
| <b>148260850</b> | Acidiphilium cryptum JF-5              | Acry_1856           | 37  |
| <b>148569941</b> | Roseiflexus sp. RS-1                   | RoseRS_3732         | 31  |
| <b>148657831</b> | Roseiflexus sp. RS-1                   | RoseRS_3732         | 31  |
| <b>149195868</b> | Lentisphaera araneosa HTCC2155         | LNTAR_18288         | 39  |
| <b>149277118</b> | Pedobacter sp. BAL39                   | PBAL39_09521        | 39  |
| <b>156232810</b> | Roseiflexus castenholzii DSM 13941     | Rcas_1499           | 34  |
| <b>156741482</b> | Roseiflexus castenholzii DSM 13941     | Rcas_1499           | 34  |
| <b>157368886</b> | Serratia proteamaculans 568            | Spro_0641           | 47  |
| <b>159185394</b> | Agrobacterium tumefaciens str. C58     | Atu2815             | 34  |
| <b>161520151</b> | Burkholderia multivorans ATCC 17616    | Bmul_3602           | 100 |
| <b>161787020</b> | Gluconacetobacter diazotrophicus PAI 5 | GDI2662             | 35  |
| <b>162148443</b> | Gluconacetobacter diazotrophicus PAI 5 | GDI_2662            | 35  |
| <b>162955562</b> | Renibacterium salmoninarum ATCC 33209  | RSal33209_3367      | 36  |
| <b>163757919</b> | Hoeflea phototrophica DFL-43           | HPDFL43_20952       | 35  |
| <b>163842086</b> | Renibacterium salmoninarum ATCC 33209  | RSal33209_3367      | 36  |
| <b>167573217</b> | Burkholderia oklahomensis C6786        | BokIC_010100025498  | 36  |
| <b>167588739</b> | Burkholderia ubonensis Bu              | BuboB_010100025635  | 75  |
| <b>167616389</b> | Burkholderia thailandensis Bt4         | BthaB_010100008821  | 36  |
| <b>167645514</b> | Caulobacter sp. K31                    | Caul_1549           | 35  |
| <b>167723063</b> | Burkholderia pseudomallei DM98         | BpseD_010100028853  | 41  |
| <b>167742041</b> | Burkholderia pseudomallei 14           | Bpse14_010100028490 | 41  |
| <b>167827600</b> | Burkholderia pseudomallei 9            | Bpseu9_010100028217 | 41  |

---

---

|                  |                                                 |                     |     |
|------------------|-------------------------------------------------|---------------------|-----|
| <b>167897671</b> | Burkholderia pseudomallei 7894                  | Bpse7_010100028294  | 37  |
| <b>167922243</b> | Burkholderia pseudomallei BCC215                | BpseBC_010100027045 | 37  |
| <b>169819795</b> | Burkholderia cenocepacia MC0-3                  | Bcenmc03_5248       | 88  |
| <b>170690989</b> | Burkholderia graminis C4D1M                     | BgramDRAFT_0964     | 38  |
| <b>170734808</b> | Burkholderia cenocepacia MC0-3                  | Bcenmc03_6311       | 39  |
| <b>170737607</b> | Burkholderia cenocepacia MC0-3                  | Bcenmc03_5248       | 88  |
| <b>171316596</b> | Burkholderia ambifaria MEX-5                    | BamMEX5DRAFT_1165   | 35  |
| <b>171992822</b> | Burkholderia ambifaria MC40-6                   | BamMC406_1250       | 34  |
| <b>171996492</b> | Burkholderia ambifaria MC40-6                   | BamMC406_4964       | 90  |
| <b>172060305</b> | Burkholderia ambifaria MC40-6                   | BamMC406_1250       | 34  |
| <b>172063975</b> | Burkholderia ambifaria MC40-6                   | BamMC406_4964       | 90  |
| <b>177840456</b> | Opitutus terrae PB90-1                          | Oter_1423           | 42  |
| <b>182413242</b> | Opitutus terrae PB90-1                          | Oter_1423           | 42  |
| <b>186473117</b> | Burkholderia phymatum STM815                    | Bphy_4296           | 39  |
| <b>187920172</b> | Burkholderia phytofirmans PsJN                  | Bphyt_5475          | 33  |
| <b>187921545</b> | Burkholderia phytofirmans PsJN                  | Bphyt_6914          | 38  |
| <b>188579155</b> | Xanthomonas oryzae pv. oryzae PXO99A            | PXO_03263           | 38  |
| <b>188993663</b> | Xanthomonas campestris pv. campestris str. B100 | xccb100_4268        | 36  |
| <b>189353670</b> | Burkholderia multivorans ATCC 17616             | FUCL                | 100 |
| <b>190688454</b> | Cellvibrio japonicus Ueda107                    | CJA_1133            | 34  |
| <b>192362289</b> | Cellvibrio japonicus Ueda107                    | CJA_1133            | 34  |
| <b>196228306</b> | Chthoniobacter flavus Ellin428                  | CfE428DRAFT_0337    | 44  |
| <b>206564115</b> | Burkholderia cenocepacia J2315                  | BCAM2279            | 89  |
| <b>209543051</b> | Gluconacetobacter diazotrophicus PAI 5          | Gdia_0875           | 35  |
| <b>217419155</b> | Burkholderia pseudomallei 576                   |                     | 37  |
| <b>221156413</b> | Thermomicrobium roseum DSM 5159                 | trd_0245            | 34  |

---

---

|                  |                                             |                  |    |
|------------------|---------------------------------------------|------------------|----|
| <b>221632278</b> | <i>Thermomicrobium roseum</i> DSM 5159      | trd_0245         | 34 |
| <b>222106233</b> | <i>Agrobacterium vitis</i> S4               | Avi_5130         | 36 |
| <b>222107024</b> | <i>Agrobacterium vitis</i> S4               | Avi_6094         | 36 |
| <b>225012444</b> | <i>Flavobacteria bacterium</i> MS024-2A     | Flav2ADRAFT_0699 | 36 |
| <b>225792604</b> | <i>Acidobacterium capsulatum</i> ATCC 51196 | ACP_3281         | 41 |
| <b>225874822</b> | <i>Acidobacterium capsulatum</i> ATCC 51196 | ACP_3281         | 41 |
| <b>227342884</b> | <i>Sinorhizobium fredii</i> NGR234          | NGR_c33720       | 36 |
| <b>237687111</b> | <i>Teredinibacter turnerae</i> T7901        | TERTU_1497       | 27 |
| <b>238025180</b> | <i>Burkholderia glumae</i> BGR1             | bglu_2g18510     | 27 |
| <b>238063427</b> | <i>Micromonospora</i> sp. ATCC 39149        | MCAG_04393       | 39 |
| <b>239820000</b> | <i>Variovorax paradoxus</i> S110            | Vapar_5317       | 38 |
| <b>247544836</b> | <i>Paenibacillus</i> sp. JDR-2              | Pjdr2_3214       | 39 |
| <b>247545185</b> | <i>Paenibacillus</i> sp. JDR-2              | Pjdr2_3571       | 39 |
| <b>254183156</b> | <i>Burkholderia pseudomallei</i> 1655       | BURPS1655_I0301  | 36 |
| <b>254254452</b> | <i>Burkholderia dolosa</i> AUO158           | BDAG_03751       | 89 |
| <b>254445687</b> | <i>Verrucomicrobiae bacterium</i> DG1235    | VDG1235_3934     | 38 |
| <b>254473858</b> | <i>Pseudovibrio</i> sp. JE062               | PJE062_3993      | 37 |
| <b>254477715</b> | <i>Ruegeria</i> sp. R11                     | RR11_3556        | 37 |
| <b>254512709</b> | <i>Rhodobacteraceae bacterium</i> KLH11     | RKLH11_3304      | 38 |
| <b>254952228</b> | <i>Dyadobacter fermentans</i> DSM 18053     | Dfer_5740        | 37 |
| <b>255039472</b> | <i>Dyadobacter fermentans</i> DSM 18053     | Dfer_5740        | 37 |
| <b>255346881</b> | <i>Pedobacter heparinus</i> DSM 2366        | Phep_4016        | 40 |
| <b>255533897</b> | <i>Pedobacter heparinus</i> DSM 2366        | Phep_4016        | 40 |
| <b>255918853</b> | <i>Actinosynnema mirum</i> DSM 43827        | Amir_0397        | 43 |
| <b>256035944</b> | <i>Chitinophaga pinensis</i> DSM 2588       | Cpin_1992        | 46 |
| <b>256356012</b> | <i>Catenulispora acidiphila</i> DSM 44928   | Caci_0572        | 41 |

---

---

|                  |                                                                     |                      |    |
|------------------|---------------------------------------------------------------------|----------------------|----|
| <b>256360281</b> | <i>Catenulispora acidiphila</i> DSM 44928                           | Caci_4918            | 41 |
| <b>256421036</b> | <i>Chitinophaga pinensis</i> DSM 2588                               | Cpin_1992            | 46 |
| <b>257142944</b> | <i>Burkholderia thailandensis</i> E264                              | BthaA_010200027538   | 36 |
| <b>260221329</b> | <i>Curvibacter putative</i> symbiont of <i>Hydra magnipapillata</i> | Csp_A13880           | 50 |
| <b>261285066</b> | <i>Paenibacillus</i> sp. Y412MC10                                   | GYMC10_4819          | 34 |
| <b>270263843</b> | <i>Serratia odorifera</i> 4Rx13                                     | SOD_f00540           | 48 |
| <b>270507167</b> | <i>Streptosporangium roseum</i> DSM 43021                           | Sros_2469            | 43 |
| <b>271963992</b> | <i>Streptosporangium roseum</i> DSM 43021                           | Sros_2469            | 43 |
| <b>283437180</b> | <i>Pirellula staleyi</i> DSM 6068                                   | Psta_0937            | 38 |
| <b>283814050</b> | <i>Kribbella flavida</i> DSM 17836                                  | Kfla_6900            | 38 |
| <b>283814638</b> | <i>Spirosoma linguale</i> DSM 74                                    | Slin_0412            | 35 |
| <b>284035345</b> | <i>Spirosoma linguale</i> DSM 74                                    | Slin_0412            | 35 |
| <b>285017256</b> | <i>Xanthomonas albilineans</i> GPE PC73                             | XALc_0445            | 36 |
| <b>288960372</b> | <i>Azospirillum</i> sp. B510                                        | AZL_a06370           | 36 |
| <b>289670743</b> | <i>Xanthomonas campestris</i> pv. <i>musacearum</i> NCPPB 4381      | XcampmN_010100020213 | 38 |
| <b>290955233</b> | <i>Streptomyces scabiei</i> 87.22                                   | SCAB_6521            | 38 |
| <b>290962724</b> | <i>Streptomyces scabiei</i> 87.22                                   | SCAB_84361           | 46 |
| <b>290963189</b> | <i>Streptomyces scabiei</i> 87.22                                   | SCAB_89131           | 36 |
| <b>291009911</b> | <i>Saccharopolyspora erythraea</i> NRRL 2338                        | SeryN2_010100035810  | 40 |
| <b>293392989</b> | <i>Serratia odorifera</i> DSM 4582                                  | HMPREF0758_0642      | 48 |
| <b>293613584</b> | <i>Coralimargarita akajimensis</i> DSM 45221                        | Caka_0715            | 42 |
| <b>294633786</b> | <i>Streptomyces</i> sp. e14                                         | SSTG_05786           | 40 |
| <b>295136183</b> | <i>Zunongwangia profunda</i> SM-A87                                 | ZPR_4361             | 35 |
| <b>295431136</b> | <i>Caulobacter segnis</i> ATCC 21756                                | Cseg_1834            | 37 |
| <b>295439939</b> | <i>Burkholderia</i> sp. CCGE1002                                    | BC1002_5166          | 38 |
| <b>295835452</b> | <i>Streptomyces</i> sp. SPB74                                       | SSBG_01350           | 42 |

---

---

|                  |                                                   |                 |    |
|------------------|---------------------------------------------------|-----------------|----|
| <b>296026623</b> | Tsukamurella paurometabola DSM 20162              | Tpau_0756       | 36 |
| <b>296138489</b> | Tsukamurella paurometabola DSM 20162              | Tpau_0756       | 36 |
| <b>296533149</b> | Roseomonas cervicalis ATCC 49957                  | HMPREF0731_1259 | 38 |
| <b>297154716</b> | Streptomyces bingchenggensis BCW-1                | SBI_01307       | 40 |
| <b>297161867</b> | Streptomyces bingchenggensis BCW-1                | SBI_08461       | 45 |
| <b>297163335</b> | Streptomyces bingchenggensis BCW-1                | SBI_09929       | 38 |
| <b>297180977</b> | uncultured Rhodobacterales bacterium HF0070_10D05 |                 | 30 |
| <b>297184415</b> | uncultured alpha proteobacterium EB080_L58F04     |                 | 33 |
| <b>297190348</b> | Streptomyces pristinaespiralis ATCC 25486         | SSDG_05839      | 41 |
| <b>297197130</b> | Streptomyces svuceus ATCC 29083                   | SSEG_09523      | 43 |
| <b>297204806</b> | Streptomyces svuceus ATCC 29083                   | SSEG_03134      | 37 |
| <b>298250329</b> | Ktedonobacter racemifer DSM 44963                 |                 | 32 |
| <b>300073170</b> | Herbaspirillum seropedicae SmR1                   | Hsero_1052      | 68 |
| <b>300076566</b> | Herbaspirillum seropedicae SmR1                   | Hsero_4499      | 61 |
| <b>300718072</b> | Erwinia billingiae Eb661                          | EbC_34970       | 47 |
| <b>300773726</b> | Sphingobacterium spiritivorum ATCC 33861          |                 | 37 |
| <b>300783763</b> | Amycolatopsis mediterranei U32                    | AMED_1842       | 40 |
| <b>300784987</b> | Amycolatopsis mediterranei U32                    | AMED_3085       | 39 |
| <b>302555691</b> | Streptomyces viridochromogenes DSM 40736          | SSQG_06920      | 39 |
| <b>304407144</b> | Paenibacillus curdlanolyticus YK9                 | PaecuDRAFT_3474 | 38 |
| <b>305665304</b> | Maribacter sp. HTCC2170                           | FB2170_03370    | 37 |

---



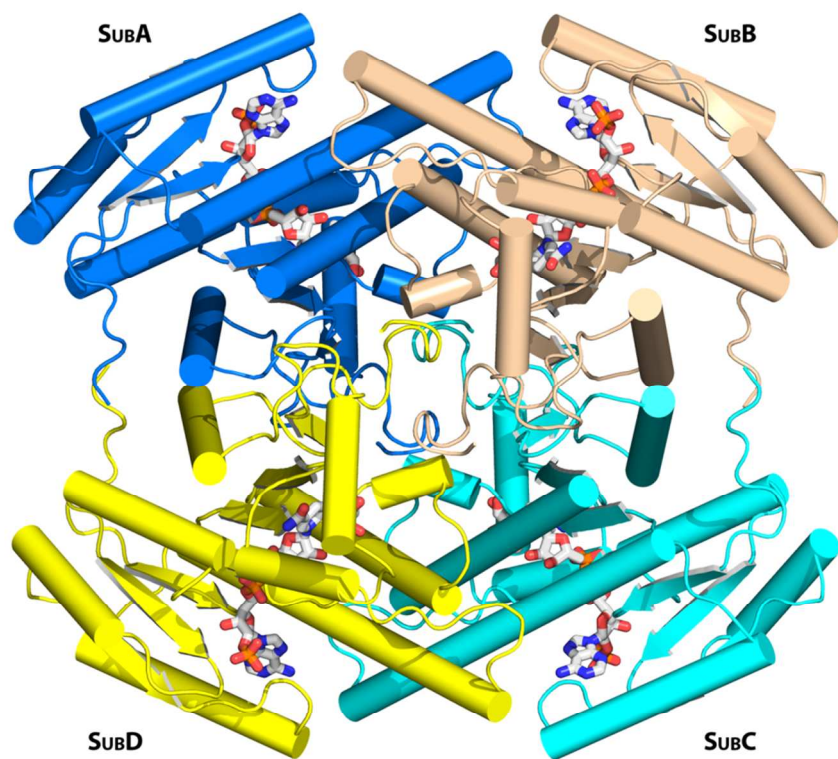

**Figure S1** Oligomeric structure of BmulJ\_04919 with bound NADP<sup>+</sup> and L-fucose shown as sticks colored by atom type
